# Supplementary material for: A survey on the model-centered approaches to conceptual modeling of IoT systems
Source: Frontiers journal article supplement (doi:10.3389/fcomp.2023.1035225), 2023-08-04
Supplement: Table_1.XLSX [file Table_1.XLSX]

## Sheet: Selected Papers
ID No	Authors	Title	Year	Source title	DOI	Document Type
1	Ruppen A., Pasquier J., Meyer S., Rüedlinger A.	A component based approach for the Web of Things	2015	ACM International Conference Proceeding Series - Web of Things	10.1145/2834791.2834792	Conference Paper
2	Wang, W.; S. De; R. Toenjes; E. Reetz; K. Moessner	A Comprehensive Ontology for Knowledge Representation in the Internet of Things	2012	2012 IEEE 11th International Conference on Trust, Security and Privacy in Computing and Communications	10.1109/TrustCom.2012.20	Conference Paper
3	Martín J.J.H., Rodríguez I.C.	A conceptual model for assessing the impact of internet-of-things technologies for people with reduced mobility in airports	2019	International Conference on Harbour, Maritime and Multimodal Logistics Modelling and Simulation		Conference Paper
5	Kautsarina, Anggorojati B.	A Conceptual Model for Promoting Positive Security Behavior in Internet of Things Era	2018	6th Global Wireless Summit, GWS 2018	10.1109/GWS.2018.8686701	Conference Paper
6	da Silva M.P., Gonçalves A.L., Dantas M.A.R.	A conceptual model for quality of experience management to provide context-aware eHealth services	2019	Future Generation Computer Systems	10.1016/j.future.2019.07.033	Article
7	Nasar W., Karlsen A.T., Hameed I.A.	A conceptual model of an IOT-based smart and sustainable solid waste management system: A case study of a Norwegian municipality	2020	Proceedings - European Council for Modelling and Simulation, ECMS		Conference Paper
8	Dragicevic N., Ullrich A., Tsui E., Gronau N.	A conceptual model of knowledge dynamics in the industry 4.0 smart grid scenario	2020	Knowledge Management Research and Practice	10.1080/14778238.2019.1633893	Article
9	Cofta P., Karatzas K., Orłowski C.	A conceptual model of measurement uncertainty in iot sensor networks	2021	Sensors	10.3390/s21051827	Article
11	Bilolo A., Boeck H.	A conceptual model of RFID's impact on relational value cocreation and appropriation	2015	2015 Americas Conference on Information Systems, AMCIS 2015		Conference Paper
12	Cavalieri A., Reis J., Amorim M.	A Conceptual Model Proposal to Assess the Effectiveness of IoT in Sustainability Orientation in Manufacturing Industry: An Environmental and Social Focus	2022	Applied Sciences (Switzerland)	10.3390/app12115661	Article
14	Maji G., Mandal S., Sen S., Debnath N.C.	A conceptual model to implement smart bus system using internet of things (IoT)	2017	Proceedings of the 32nd International Conference on Computers and Their Applications, CATA 2017		Conference Paper
15	Mavropoulos O., Mouratidis H., Fish A., Panaousis E., Kalloniatis C.	A conceptual model to support security analysis in the internet of things	2017	Computer Science and Information Systems	10.2298/CSIS160110016M	Article
17	Lopez V., Akundi A.	A Conceptual Model-based Systems Engineering (MBSE) approach to develop Digital Twins	2022	SysCon 2022 - 16th Annual IEEE International Systems Conference, Proceedings	10.1109/SysCon53536.2022.9773869	Conference Paper
18	Maulidiya D., Santoso H.B., Hasibuan Z.A.	A conceptual multi-dimensional model for smart learning environments	2019	2019 International Conference on Advanced Computer Science and Information Systems, ICACSIS 2019	10.1109/ICACSIS47736.2019.8979679	Conference Paper
19	Arabsorkhi A., Sayad Haghighi M., Ghorbanloo R.	A conceptual trust model for the Internet of Things interactions	2017	2016 8th International Symposium on Telecommunications, IST 2016	10.1109/ISTEL.2016.7881789	Conference Paper
22	Ahmed S., Rashid M., Alam F., Fakhruddin B.	A Disaster Response Framework Based on IoT and D2D Communication under 5G Network Technology	2019	2019 29th International Telecommunication Networks and Applications Conference, ITNAC 2019	10.1109/ITNAC46935.2019.9077975	Conference Paper
23	Erazo-Garzon, L. ;n; P. Cedillo; G. Rossi; J. Moyano	A Domain-Specific Language for Modeling IoT System Architectures That Support Monitoring	2022	IEEE Access	10.1109/ACCESS.2022.3181166	Article
24	Jin X., Chun S., Jung J., Lee K.-H.	A fast and scalable approach for IoT service selection based on a physical service model	2017	Information Systems Frontiers	10.1007/s10796-016-9650-1	Article
25	Yang G., Yu H., Zhang H., Yu X.	A metadata-based representation method of the internet of things	2018	Proceedings - 2018 IEEE 3rd International Conference on Data Science in Cyberspace, DSC 2018	10.1109/DSC.2018.00080	Conference Paper
26	Fitz T., Theiler M., Smarsly K.	A metamodel for cyber-physical systems	2019	Advanced Engineering Informatics	10.1016/j.aei.2019.100930	Article
27	Cicirelli F., Fortino G., Guerrieri A., Mercuri A., Spezzano G., Vinci A.	A metamodel framework for edge-based smart environments	2018	Proceedings - 2018 IEEE International Conference on Cloud Engineering, IC2E 2018	10.1109/IC2E.2018.00067	Conference Paper
28	Saidi A., Kacem M.H., Tounsi I., Kacem A.H.	A Meta-Modeling Approach to Describe Internet of Things Architectures	2021	CEUR Workshop Proceedings		Conference Paper
29	Riedel T., Yordanov D., Fantana N., Scholz M., Decker C.	A model driven internet of things	2010	INSS 2010 - 7th International Conference on Networked Sensing Systems	10.1109/INSS.2010.5573154	Conference Paper
30	Iban M.C., Aksu O.	A model for big spatial rural data infrastructure in Turkey: Sensor-driven and integrative approach	2020	Land Use Policy	10.1016/j.landusepol.2019.104376	Article
31	Ziaei,M. ; B. Zamani; A. Bohlooli	A Model-Driven Approach for IoT-Based Monitoring Systems in Industry 4.0	2020	2020 4th International Conference on Smart City, Internet of Things and Applications (SCIOT)	10.1109/SCIOT50840.2020.9250202	Conference Paper
32	Bisma M., Azam F., Rasheed Y., Anwar M.W.	A Model-Driven Framework for Ensuring Role Based Access Control in IoT Devices	2020	ACM International Conference Proceeding Series	10.1145/3404555.3404582	Conference Paper
33	Simon Van Mierlo, Yentl Van Tendeloo, István Dávid, Bart Meyers, Addis Gebremichael, and Hans Vangheluwe	A multi-paradigm approach for modelling service interactions in model-driven engineering processes	2018	Proceedings of the Model-driven Approaches for Simulation Engineering Symposium (Mod4Sim '18)		Conference Paper
34	El Khalyly B., Belangour A., Banane M., Erraissi A.	A new metamodel approach of CI/CD applied to Internet of Things Ecosystem	2020	2020 IEEE 2nd International Conference on Electronics, Control, Optimization and Computer Science, ICECOCS 2020	10.1109/ICECOCS50124.2020.9314485	Conference Paper
35	Sicari S., Rizzardi A., Coen-Porisini A., Cappiello C.	A NFP model for internet of things applications	2014	International Conference on Wireless and Mobile Computing, Networking and Communications	10.1109/WiMOB.2014.6962181	Conference Paper
36	Dias, J. P. ; J. P. Faria; H. S. Ferreira	A Reactive and Model-Based Approach for Developing Internet-of-Things Systems	2018	2018 11th International Conference on the Quality of Information and Communications Technology (QUATIC)	10.1109/QUATIC.2018.00049	Conference Paper
37	Ungurean I., Gaitan N.C.	A software architecture for the industrial internet of things—a conceptual model	2020	Sensors (Switzerland)	10.3390/s20195603	Article
38	Gianna Reggio	A UML-based proposal for IoT system requirements specification	2018	Proceedings of the 10th International Workshop on Modelling in Software Engineering (MiSE '18)	10.1145/3193954.3193956	Conference Paper
39	Sanctorum A., Signer B.	A Unifying reference framework and model for adaptive distributed hybrid user interfaces	2019	Proceedings - International Conference on Research Challenges in Information Science	10.1109/RCIS.2019.8877048	Conference Paper
41	Karagiannis D.	Agile modeling method engineering	2015	ACM International Conference Proceeding Series	10.1145/2801948.2802040	Conference Paper
42	Hu S., Wang H., She C., Wang J.	AgOnt: Ontology for agriculture internet of things	2011	IFIP Advances in Information and Communication Technology	10.1007/978-3-642-18333-1_18	Conference Paper
43	Nocera F., Parchitelli A.	An Adaptive Formal Metamodel for Semantic Complex Event Processing-Driven Social Internet of Things Network	2018	Lecture Notes in Computer Science (including subseries Lecture Notes in Artificial Intelligence and Lecture Notes in Bioinformatics)	10.1007/978-3-319-74433-9_1	Conference Paper
44	Alkhabbas F., Spalazzese R., Davidsson P.	An agent-based approach to realize emergent configurations in the internet of things	2020	Electronics (Switzerland)	10.3390/electronics9091347	Article
45	Santos L., Silva E., Batista T., Cavalcante E., Leite J., Oquendo F.	An architectural style for internet of things systems	2020	Proceedings of the ACM Symposium on Applied Computing	10.1145/3341105.3374030	Conference Paper
46	Nowakowski E., Farwick M., Trojer T., Häusler M., Kessler J., Breu R.	An enterprise architecture planning process for industry 4.0 transformations	2019	ICEIS 2019 - Proceedings of the 21st International Conference on Enterprise Information Systems	10.5220/0007680005720579	Conference Paper
47	Patil U.A., Venkatesan M., Prasad S.	An Improved Wireless Network Architecture for IoT in Hospital Healthcare	2021	2021 IEEE Bombay Section Signature Conference, IBSSC 2021	10.1109/IBSSC53889.2021.9673340	Conference Paper
48	Wang L., Hayashi S., Saeki M.	An improvement on data interoperability with large-scale conceptual model and its application in industry	2017	CEUR Workshop Proceedings		Conference Paper
49	Rosa E.S., Godina R., Rodrigues E.M.G., Matias J.C.O.	An Industry 4.0 Conceptual Model Proposal for Cable Harness Testing Equipment Industry	2022	Procedia Computer Science	10.1016/j.procs.2022.01.340	Conference Paper
50	Charoenporn P.	An IoT architecture for smart rice monitoring	2019	ACM International Conference Proceeding Series	10.1145/3380678.3380684	Conference Paper
52	Ben Hassine T., Khayati O., Ben Ghezala H.	An IoT domain meta-model and an approach to software development of IoT solutions	2018	2017 International Conference on Internet of Things, Embedded Systems and Communications, IINTEC 2017 - Proceedings	10.1109/IINTEC.2017.8325909	Conference Paper
53	Bali A., Al-Osta M., Abdelouahed G.	An ontology-based approach for IoT data processing using semantic rules	2017	Lecture Notes in Computer Science (including subseries Lecture Notes in Artificial Intelligence and Lecture Notes in Bioinformatics)	10.1007/978-3-319-68015-6_5	Conference Paper
54	Pereira D.M.G., da S. e Silva F.J., de Salles S. Neto C., dos Santos D.V., Coutinho L.R., Guedes Á.L.V.	An ontology-based approach to integrate TV and IoT middlewares	2021	Multimedia Tools and Applications	10.1007/s11042-020-09645-4	Article
55	Asici, T. Z. ; B. Karaduman; R. Eslampanah; M. Challenger; J. Denil; H. Vangheluwe	Applying Model Driven Engineering Techniques to the Development of Contiki-Based IoT Systems	2019	2019 IEEE/ACM 1st International Workshop on Software Engineering Research & Practices for the Internet of Things (SERP4IoT)	10.1109/SERP4IoT.2019.00012	Conference Paper
57	Hasan S., Curry E.	Approximate semantic matching of events for the internet of things	2014	ACM Transactions on Internet Technology	10.1145/2633684	Article
58	Ryan Brotman, Winslow Burleson, Jodi Forlizzi, William Heywood, and Jisoo Lee	Building Change: Constructive Design of Smart Domestic Environments for Goal Achievement	2015	Proceedings of the 33rd Annual ACM Conference on Human Factors in Computing Systems (CHI '15)	10.1145/2702123.2702602	Conference Paper
59	Huber R.X.R., Püschel L.C., Röglinger M.	Capturing smart service systems: Development of a domain-specific modelling language	2019	Information Systems Journal	10.1111/isj.12269	Conference Paper
60	Guenduez A.A., Mettler T., Schedler K.	Citizen Participation in Smart Government: A Conceptual Model and Two IoT Case Studies	2020	Public Administration and Information Technology	10.1007/978-3-030-37464-8_9	Book Chapter
61	Sgarbossa F., Peron M., Fragapane G.	Cloud material handling systems: Conceptual model and cloud-based scheduling of handling activities	2020	International Series in Operations Research and Management Science	10.1007/978-3-030-43177-8_5	Book Chapter
62	Akbaripour H., Houshmand M., Valilai O.F.	Cloud-Based Global Supply Chain: A Conceptual Model and Multilayer Architecture	2015	Journal of Manufacturing Science and Engineering, Transactions of the ASME	10.1115/1.4030887	Article
63	Soltanpoor R., Yavari A.	CoALA: Contextualization Framework for Smart Learning Analytics	2017	Proceedings - IEEE 37th International Conference on Distributed Computing Systems Workshops, ICDCSW 2017	10.1109/ICDCSW.2017.58	Conference Paper
64	Tomlain J., Teren O., Tomlain J.	Communication technologies and data exchange possibilities for smart energy solutions	2018	Proceedings of the International Conference on New Trends in Signal Processing, NTSP 2018	10.23919/NTSP.2018.8524097	Conference Paper
65	Faruk Hasić, Estefanía Serral, and Monique Snoeck	Comparing BPMN to BPMN + DMN for IoT process modelling: a case-based inquiry	2020	Proceedings of the 35th Annual ACM Symposium on Applied Computing	10.1145/3341105.3373881	Conference Paper
66	Chong Z.Q., Low C.Y., Mohammad U., Rahman R.A., Shaari M.S.B.	Conception of logistics management system for smart factory	2018	International Journal of Engineering and Technology(UAE)	10.14419/ijet.v7i4.27.22499	Article
68	Bareta D.S., Muñiz G.	Conceptual model for the explanation of the phenomenon of radical innovation in the disruption of the internet of things, on scales of smart objects, homes and cities	2017	Lecture Notes of the Institute for Computer Sciences, Social-Informatics and Telecommunications Engineering, LNICST	10.1007/978-3-319-49622-1_12	Conference Paper
69	Kryvinska N., Strauss C.	Conceptual model of business services availability vs. interoperability on collaborative IoT-enabled eBusiness Platforms	2013	Studies in Computational Intelligence	10.1007/978-3-642-34952-2_7	Article
70	Ruchkin V., Soldatov G., Koryachko A., Kostrov B., Ruchkina E.	Conceptual Model of Hardware Software Co-design for Multicore Systems on Chip	2020	2020 9th Mediterranean Conference on Embedded Computing, MECO 2020	10.1109/MECO49872.2020.9134207	Conference Paper
71	Osolinskyi O., Kolodiichuk L., Lipyanina-Goncharenko H., Sachenko A., Kopania L., Kochan V., Zahorodnia D.	Conceptual model of IoT-based laboratory for study the electrical engineering and electronics	2021	CEUR Workshop Proceedings		Conference Paper
72	Yuan B., Chen D.-J., Xu D.-M., Chen M.	Conceptual model of real-time IoT systems	2019	Frontiers of Information Technology and Electronic Engineering	10.1631/FITEE.1900115	Article
73	Yi G., Zainuddin N.M., Bt Abu Bakar N.A.	Conceptual model on internet banking acceptance in China with social network influence	2021	International Journal on Informatics Visualization	10.30630/joiv.5.2.403	Article
74	Seel C., Schimmelpfennig J., Mayer D., Walter P.	Conceptual modeling of complex events of the internet of things	2010	eChallenges e-2010 Conference		Conference Paper
76	Mohaghar A., Yazdi M.R.T., Jolai F., Mohammadi M., Panjeh S.A.	Conceptual modeling of the internet of things implementation in hospitals supply chain	2019	Journal of Information Technology Management	10.22059/jitm.2019.287928.2396	Article
77	Shin D.-H.	Conceptualizing and measuring quality of experience of the internet of things: Exploring how quality is perceived by users	2017	Information and Management	10.1016/j.im.2017.02.006	Article
78	Zubrzycki J., Świć A., Sobaszek Ł., Kovac J., Kralikova R., Jencik R., Smidova N., Arapi P., Dulencin P., Homza J.	CYBER-PHYSICAL SYSTEMS TECHNOLOGIES AS A KEY FACTOR IN THE PROCESS OF INDUSTRY 4.0 AND SMART MANUFACTURING DEVELOPMENT	2021	Applied Computer Science	10.23743/acs-2021-31	Article
79	Bumanis N., Arhipova I., Paura L., Vitols G., Jankovska L.	Data Conceptual Model for Smart Poultry Farm Management System	2022	Procedia Computer Science	10.1016/j.procs.2022.01.249	Conference Paper
80	Aleithe, M., P. Skowron, B. Franczyk, and B. Sommer	Data modeling of smart urban object networks.	2017	Proceedings of the International Conference on Web Intelligence (WI '17)	10.1145/3106426.3117759	Conference Paper
81	Huang C.Y., Wu C.H.	Design and implement an interoperable Internet of Things application based on an extended OGC sensorthings API Standard	2016	International Archives of the Photogrammetry, Remote Sensing and Spatial Information Sciences - ISPRS Archives	10.5194/isprsarchives-XLI-B4-263-2016	Conference Paper
82	Salihbegovic, A.; T. Eterovic; E. Kaljic; S. Ribic	Design of a domain specific language and IDE for Internet of things applications	2015	2015 38th International Convention on Information and Communication Technology, Electronics and Microelectronics (MIPRO)	10.1109/MIPRO.2015.7160420	Conference Paper
83	Moghaddam M.T., Muccini H., Dugdale J., Kjagaard M.B.	Designing Internet of Behaviors Systems	2022	Proceedings - IEEE 19th International Conference on Software Architecture, ICSA 2022	10.1109/ICSA53651.2022.00020	Conference Paper
84	Al-Ali A.R., Gupta R., Batool T.Z., Landolsi T., Aloul F., Nabulsi A.A.	Digital twin conceptual model within the context of internet of things	2020	Future Internet	10.3390/fi12100163	Article
85	Buchmann R.A., Karagiannis D.	Domain-specific diagrammatic modelling: a source of machine-readable semantics for the Internet of Things	2017	Cluster Computing	10.1007/s10586-016-0695-1	Article
86	Marah H.M., Eslampanah R., Challenger M.	DSML4TinyOS: Code generation for wireless devices	2018	CEUR Workshop Proceedings		Conference Paper
87	Plachkinova M., Vo A., Alluhaidan A.	Emerging trends in smart home security, privacy, and digital forensics	2016	AMCIS 2016: Surfing the IT Innovation Wave - 22nd Americas Conference on Information Systems		Conference Paper
89	Jahed, K.; J. Dingel	Enabling Model-Driven Software Development Tools for the Internet of Things	2019	2019 IEEE/ACM 11th International Workshop on Modelling in Software Engineering (MiSE)	10.1109/MiSE.2019.00022	Conference Paper
90	Alqahtani A., Li Y., Patel P., Solaiman E., Ranjan R.	End-To-End Service Level Agreement Specification for IoT Applications	2018	Proceedings - 2018 International Conference on High Performance Computing and Simulation, HPCS 2018	10.1109/HPCS.2018.00147	Conference Paper
91	Joseph A., Balachandra P.	Energy internet, the future electricity system: Overview, concept, model structure, and mechanism	2020	Energies	10.3390/en13164242	Article
92	Pusztai, T. W.; C. Tsigkanos; S. Dustdar	Engineering Heterogeneous Internet of Things Applications: From Models to Code	2019	2019 IEEE 5th International Conference on Collaboration and Internet Computing (CIC)	10.1109/CIC48465.2019.00036	Conference Paper
93	Tesse J., Baldauf U., Schirmer I., Drews P., Saxe S.	Extending internet of things enterprise architectures by digital twins exemplified in the context of the Hamburg Port Authority	2021	27th Annual Americas Conference on Information Systems, AMCIS 2021		Conference Paper
94	Yang C.	FPGA in IoT Edge Computing and Intelligence Transportation Applications	2021	2021 IEEE International Conference on Robotics, Automation and Artificial Intelligence, RAAI 2021	10.1109/RAAI52226.2021.9507835	Conference Paper
96	Bernini D., Tisato F.	From internet of things to spaces of things	2012	Proceedings - 2012 IEEE Int. Conf. on Green Computing and Communications, GreenCom 2012, Conf. on Internet of Things, iThings 2012 and Conf. on Cyber, Physical and Social Computing, CPSCom 2012	10.1109/GreenCom.2012.113	Conference Paper
97	Abbasi K.M., Khan T.A., Haq I.U.	Hierarchical Modeling of Complex Internet of Things Systems Using Conceptual Modeling Approaches	2019	IEEE Access	10.1109/ACCESS.2019.2930933	Article
99	Seiger R., Kühn R., Korzetz M., Aßmann U.	HoloFlows: modelling of processes for the Internet of Things in mixed reality	2021	Software and Systems Modeling	10.1007/s10270-020-00859-6	Article
100	Walch M., Karagiannis D.	How to connect design thinking and cyber-physical systems: The s*IoT conceptual modelling approach	2019	Proceedings of the Annual Hawaii International Conference on System Sciences		Conference Paper
102	Kohen H., Dori D.	Improving conceptual modeling with object-process methodology stereotypes	2021	Applied Sciences (Switzerland)	10.3390/app11052301	Article
103	Hämäläinen M., Tyrväinen P.	Improving smart city design: A conceptual model for governing complex smart city ecosystems	2018	31st Bled eConference: Digital Transformation: Meeting the Challenges, BLED 2018	10.18690/978-961-286-170-4.17	Conference Paper
105	Alhaboobi Z.A.F., Yousif S.T., Shawkat A.R.	Intelligent Classroom a Conceptual Model for the Effective Use of Internet of Things Technique	2019	SCCS 2019 - 2019 2nd Scientific Conference of Computer Sciences	10.1109/SCCS.2019.8852612	Conference Paper
106	Laassiri J., Krit S.-D.	Internet of Things - Architecture and concepts in ODP information language	2016	Proceedings - 2016 International Conference on Engineering and MIS, ICEMIS 2016	10.1109/ICEMIS.2016.7745336	Conference Paper
108	Stelmach P., Falas Ł., Kasiukiewicz G., Kwaśnicka P., Świątek P.	IoT modelling and runtime suite for e-Health	2016	2016 IEEE 18th International Conference on e-Health Networking, Applications and Services, Healthcom 2016	10.1109/HealthCom.2016.7749433	Conference Paper
109	Marcelo Pitanga Alves, Flávia C. Delicato, and Paulo F. Pires	IoTA-MD: a model-driven approach for applying QoS attributes in the development of the IoT systems	2017	Proceedings of the Symposium on Applied Computing (SAC '17)	10.1145/3019612.3019800	Conference Paper
110	Dahanayake K.C., Sumanarathna N.	IoT-BIM-based digital transformation in facilities management: a conceptual model	2022	Journal of Facilities Management	10.1108/JFM-10-2020-0076	Article
111	Li Y., Alqahtani A., Solaiman E., Perera C., Jayaraman P.P., Buyya R., Morgan G., Ranjan R.	IoT-CANE: A unified knowledge management system for data-centric Internet of Things application systems	2019	Journal of Parallel and Distributed Computing	10.1016/j.jpdc.2019.04.016	Article
113	Escamilla-Ambrosio, P. J.; D. A. Robles-RamÃ­rez; T. Tryfonas; A. RodrÃ­guez-Mota; G. Gallegos-GarcÃ­a; M. Salinas-Rosales	IoTsecM: A UML/SysML Extension for Internet of Things Security Modeling	2021	IEEE Access	10.1109/ACCESS.2021.3125979	Article
114	Walch M.	Knowledge engineering and machine learning for design and use in cyber-physical environments	2019	CEUR Workshop Proceedings		Conference Paper
115	Cicirelli F., Fortino G., Guerrieri A., Spezzano G., Vinci A.	Metamodeling of Smart Environments: from design to implementation	2017	Advanced Engineering Informatics	10.1016/j.aei.2016.11.005	Article
116	Karaduman, B.; M. Challenger	Model-driven Development for ESP-based IoT Systems	2021	2021 IEEE/ACM 3rd International Workshop on Software Engineering Research and Practices for the IoT (SERP4IoT)	10.1109/SERP4IoT52556.2021.00008	Conference Paper
117	Pal A., Mukherjee A., Balamuralidhar P.	Model-driven development for internet of things: Towards easing the concerns of application developers	2015	Lecture Notes of the Institute for Computer Sciences, Social-Informatics and Telecommunications Engineering, LNICST	10.1007/978-3-319-19656-5_46	Conference Paper
118	Cai H., Gu Y., Vasilakos A.V., Xu B., Zhou J.	Model-Driven Development Patterns for Mobile Services in Cloud of Things	2018	IEEE Transactions on Cloud Computing	10.1109/TCC.2016.2526007	Article
119	Rodríguez-Molano J.I., López-Bello C.A., Contreras-Bravo L.E.	Modeling and Implementation Data Architecture for the Internet of Things and Industry 4.0	2018	Communications in Computer and Information Science	10.1007/978-3-030-00353-1_19	Conference Paper
121	Diaconescu, M. ; G. Wagner	Modeling and simulation of Web-of-Things systems part 1: Sensor nodes	2015	2015 Winter Simulation Conference (WSC)	10.1109/WSC.2015.7408409	Conference Paper
122	Gianotti M., Riccardi F., Cosentino G., Garzotto F., Matera M.	Modeling Interactive Smart Spaces	2020	Lecture Notes in Computer Science (including subseries Lecture Notes in Artificial Intelligence and Lecture Notes in Bioinformatics)	10.1007/978-3-030-62522-1_30	Conference Paper
123	Song J., Karagiannis D., Lee M.	Modeling Method to Abstract Collective Behavior of Smart IoT Systems in CPS	2022	Sensors	10.3390/s22135057	Article
124	Costa, B.; P. F. Pires; F. C. Delicato	Modeling SOA-Based IoT Applications with SoaML4IoT	2019	2019 IEEE 5th World Forum on Internet of Things (WF-IoT)	10.1109/WF-IoT.2019.8767218	Conference Paper
125	Valderas P., Torres V., Serral E.	Modelling and executing IoT-enhanced business processes through BPMN and microservices	2022	Journal of Systems and Software	10.1016/j.jss.2021.111139	Article
126	Durmaz C., Challenger M., Dagdeviren O., Kardas G.	Modelling contiki-based IoT systems - relevant	2017	OpenAccess Series in Informatics	10.4230/OASIcs.SLATE.2017.5	Conference Paper
127	Galia Novakova Nedeltcheva and Elena Shoikova	Models for Innovative IoT Ecosystems.	2017	Proceedings of the International Conference on Big Data and Internet of Thing (BDIOT2017)	10.1145/3175684.3175710	Conference Paper
129	Belhassena A., Bimonte S., Battistoni P., Cariou C., Chalhoub G., Corrales J.C., Laneurit J., Moussa R., Plazas J.E., Wrembel R., Sebillo M.	On modeling data for iot agroecology applications by means of a UML profile	2021	ACM International Conference Proceeding Series	10.1145/3444757.3485109	Conference Paper
130	Mallik A., Tripathi A., Kumar R., Chaudhury S., Sinha K.	Ontology based context aware situation tracking	2015	IEEE World Forum on Internet of Things, WF-IoT 2015 - Proceedings	10.1109/WF-IoT.2015.7389137	Conference Paper
131	Manaa M., Akaichi J.	Ontology-based modeling and querying of trajectory data	2017	Data and Knowledge Engineering	10.1016/j.datak.2017.06.005	Article
133	Bajenaru L., Dobre C., Ciobanu R.-I., Balog A.	Patient profile using ontologies in an older adults monitoring IoT-based platform	2019	2019 7th E-Health and Bioengineering Conference, EHB 2019	10.1109/EHB47216.2019.8970027	Conference Paper
134	Maidl M., Wirtz R., Zhao T., Heisel M., Wagner M.	Pattern-based modeling of cyber-physical systems for analyzing security	2019	ACM International Conference Proceeding Series	10.1145/3361149.3361172	Conference Paper
135	Karaduman B., Challenger M., Eslampanah R., Denil J., Vangheluwe H.	Platform-specific Modeling for RIOT based IoT Systems	2020	Proceedings - 2020 IEEE/ACM 42nd International Conference on Software Engineering Workshops, ICSEW 2020	10.1145/3387940.3392194	Conference Paper
136	Tavares A., Giunchiglia F., Xu H., Liang Y.	Position on interoperability everywhere under IoT-ARM	2015	CEUR Workshop Proceedings		Conference Paper
137	Rahmani M., Song J., Lee M.	PRISM: A knowledge engineering tool to model collective behaviors of real-time IoT systems	2017	CEUR Workshop Proceedings		Conference Paper
138	Bouzid M., Ayadi M., Cheutet V., Haddar M.	Proposition of a conceptual model for knowledge integration and management in digital factory	2016	IFIP Advances in Information and Communication Technology	10.1007/978-3-319-33111-9_34	Conference Paper
142	Claudia Kaar, Josef Frysak, Christian Stary, Udo Kannengiesser, and Harald Müller	Resilient Ontology Support Facilitating Multi-Perspective Process Integration in Industry 4.0	2018	Proceedings of the 10th International Conference on Subject-Oriented Business Process Management (S-BPM One '18)	10.1145/3178248.3178253	Conference Paper
143	Tsoutsa, P., P. Fitsilis, and O. Ragos.	Role Modeling of IoT services in industry domains	2017	Proceedings of the 2017 International Conference on Management Engineering, Software Engineering and Service Sciences (ICMSS '17)	10.1145/3034950.3035002	Conference Paper
144	Zhu M., Ye X., Xiang T., Ma Y., Chen X.	Runtime knowledge graph based approach to smart home application development	2018	Proceedings - 2018 IEEE International Congress on Internet of Things, ICIOT 2018 - Part of the 2018 IEEE World Congress on Services	10.1109/ICIOT.2018.00022	Conference Paper
145	Alfred Åkesson, Görel Hedin, Niklas Fors, Rene Schöne, and Johannes Mey.	Runtime modeling and analysis of IoT systems	2020	Proceedings of the 23rd ACM/IEEE International Conference on Model Driven Engineering Languages and Systems: Companion Proceedings	10.1145/3417990.3421397	Conference Paper
146	Moreira J., Ferreira Pires L., Sinderen M.V., Daniele L.	SAREF4health: IoT standard-based ontology-driven healthcare systems	2018	Frontiers in Artificial Intelligence and Applications	10.3233/978-1-61499-910-2-239	Conference Paper
147	Machorro-Cano I., Olmedo-Aguirre J.O., Alor-Hernández G., Rodríguez-Mazahua L., Sánchez-Cervantes J.L., López-Chau A.	SCM-IoT: An Aproach for Internet of Things Services Integration and Coordination	2022	Applied Sciences (Switzerland)	10.3390/app12063133	Article
149	Van Der Vlist B.J.J., Niezen G., Hu J., Feijs L.M.G.	Semantic connections: Exploring and manipulating connections in smart spaces	2010	Proceedings - IEEE Symposium on Computers and Communications	10.1109/ISCC.2010.5546636	Conference Paper
150	Plazas J.E., Bimonte S., Schneider M., de Vaulx C., Battistoni P., Sebillo M., Corrales J.C.	Sense, Transform & Send for the Internet of Things (STS4IoT): UML profile for data-centric IoT applications	2022	Data and Knowledge Engineering	10.1016/j.datak.2021.101971	Article
152	Suakanto S., Engel V.J.L., Hutagalung M., Angela D.	Sensor networks data acquisition and task management for decision support of smart farming	2017	2016 International Conference on Information Technology Systems and Innovation, ICITSI 2016 - Proceedings	10.1109/ICITSI.2016.7858233	Conference Paper
153	Leppänen T., Savaglio C., Fortino G.	Service modeling for opportunistic edge computing systems with feature engineering	2020	Computer Communications	10.1016/j.comcom.2020.04.011	Conference Paper
154	Barriga, J. A. ; P. J. Clemente; E. Sosa-SÃ¡nchez; Ã. E. Prieto	SimulateIoT: Domain Specific Language to Design, Code Generation and Execute IoT Simulation Environments	2021	IEEE Access	10.1109/ACCESS.2021.3092528	Article
155	Raglin A.J., Huang D., Liu H., McCabe J.	Smart CCR IoT: Internet of things testbed	2019	Proceedings - 2019 IEEE 5th International Conference on Collaboration and Internet Computing, CIC 2019	10.1109/CIC48465.2019.00037	Conference Paper
156	Daniela Elisabeth Ströckl, Elena Oberrauner, Johanna Plattner, Claudia Steinberger, Vladimir A. Shekhovtsov, Gerhard Leitner, Christian Kop, and Peter Schartner	Smart city technology meets smart health assistive systems - on the example of the project AYUDO	2020	Proceedings of the 13th ACM International Conference on PErvasive Technologies Related to Assistive Environments (PETRA '20)	10.1145/3389189.3397985	Conference Paper
157	Wang X., Zhou K., Wang T.	Smart Farm Based on Six-Domain Model	2021	2021 IEEE 4th International Conference on Electronics Technology, ICET 2021	10.1109/ICET51757.2021.9451003	Conference Paper
158	Lu Y., Ju F.	Smart Manufacturing Systems based on Cyber-physical Manufacturing Services (CPMS)	2017		10.1016/j.ifacol.2017.08.2349	Conference Paper
159	Sulistyo S.	Software development methods in the Internet of Things	2013	Lecture Notes in Computer Science (including subseries Lecture Notes in Artificial Intelligence and Lecture Notes in Bioinformatics)	10.1007/978-3-642-36818-9_6	Conference Paper
161	Meyer S., Ruppen A., Hilty L.	The things of the internet of things in BPMN	2015	Lecture Notes in Business Information Processing	10.1007/978-3-319-19243-7_27	Conference Paper
162	Elawady M., Sarhan A., Alshewimy M.A.M.	Toward a mixed reality domain model for time-Sensitive applications using IoE infrastructure and edge computing (MRIoEF)	2022	Journal of Supercomputing	10.1007/s11227-022-04307-8	Article
163	Noël F., Dori D.	Towards 3D visualization metaphors for better PLM perception	2016	IFIP Advances in Information and Communication Technology	10.1007/978-3-319-33111-9_42	Conference Paper
164	Fortino, G.; A. Guerrieri; W. Russo; C. Savaglio	Towards a Development Methodology for Smart Object-Oriented IoT Systems: A Metamodel Approach	2015	2015 IEEE International Conference on Systems, Man, and Cybernetics	10.1109/SMC.2015.231	Conference Paper
165	Matthew Amissah, Ange-Lionel Toba, Holly A. H. Handley, and Mamadou Seck	Towards a framework for executable systems modeling: an executable systems modeling language (ESysML)	2018	Proceedings of the Model-driven Approaches for Simulation Engineering Symposium (Mod4Sim '18)		Conference Paper
168	Abdelouahid R.A., Marzak A., Sae N.	Towards a New Meta-Model of IoT Interoperability	2018	Colloquium in Information Science and Technology, CIST	10.1109/CIST.2018.8596441	Conference Paper
169	Smaali S., Boucebsi R.	Towards Metamodeling approach for IoT based System of Systems	2021	CEUR Workshop Proceedings		Conference Paper
170	De S., Niklas M., Rooney B., Mottok J., Brada P.	Towards semantic model-to-model mapping of cross-domain component interfaces for interoperability of vehicle applications: An approach towards synergy exploration	2019	CEUR Workshop Proceedings		Conference Paper
171	Rahman L.F., Ozcelebi T., Lukkien J.	Understanding IoT Systems: A Life Cycle Approach	2018	Procedia Computer Science	10.1016/j.procs.2018.04.148	Conference Paper
172	Michael J., Koschmider A., Mannhardt F., Baracaldo N., Rumpe B.	User-centered and privacy-driven process mining system design for IoT	2019	Lecture Notes in Business Information Processing	10.1007/978-3-030-21297-1_17	Conference Paper
173	Zarri G.P.	Using a High-Level Conceptual Model as a Support for the Generalized World Entities (GWEs) Paradigm	2020	ACM International Conference Proceeding Series	10.1145/3447568.3448547	Conference Paper
174	Morkevicius, A.; L. Bisikirskiene; G. Bleakley	Using a systems of systems modeling approach for developing Industrial Internet of Things applications	2017	2017 12th System of Systems Engineering Conference (SoSE)	10.1109/SYSOSE.2017.7994942	Conference Paper
175	Mainetti L., Manco L., Patrono L., Sergi I., Vergallo R.	Web of Topics: An IoT-aware model-driven designing approach	2015	IEEE World Forum on Internet of Things, WF-IoT 2015 - Proceedings	10.1109/WF-IoT.2015.7389025	Conference Paper
176	Nawaz N.A., Waqas A., Yusof Z.M., Mahesar A.W., Shah A.	WSN based sensing model for smart crowd movement with identification: An extended study	2017	Journal of Theoretical and Applied Information Technology		Article
177	Corradini F., Fedeli A., Fornari F., Polini A., Re B.	X-IoT: A Model-Driven Approach for Cross-Platform IoT Applications Development	2022	Proceedings of the ACM Symposium on Applied Computing	10.1145/3477314.3507164	Conference Paper
